# Supplementary material
Source: publisher figshare collection journal article supplement (https://acs.figshare.com/ndownloader/files/27578686)
Supplement: Supplementary file 1 [file 27578686]

**Supplementary Information**  
of  
**Enhanced Stability and Epitaxial Growth Mechanism of  
Honeycomb Borophene Monolayer on a Two-Dimensional  
Ti<sub>2</sub>C Substrate**

Kaiwen Pu<sup>a,b</sup>, Xianying Dai<sup>a,b\*</sup>, Yuyu Bu<sup>a,b\*</sup>, Yiwei Guo<sup>a,b</sup>, Qiu Jin<sup>a,b</sup>, Jianjun Song<sup>a,b</sup>,

Tianlong Zhao<sup>a,b</sup>, Tianmin Lei<sup>c</sup>

*a. School of Microelectronics, Xidian University, Xi'an 710071, China*

*b. State Key Discipline Laboratory of Wide Bandgap Semiconductor Technologies,  
Xidian University, Xi'an 710071, China*

*c. School of Advanced Materials and Nanotechnology,, Xidian University, Xi'an  
710126, China*

\* E-mail address: xydai@xidian.edu.cn (X. Dai)

\* E-mail address: yybu@xidian.edu.cn (Y. Bu)

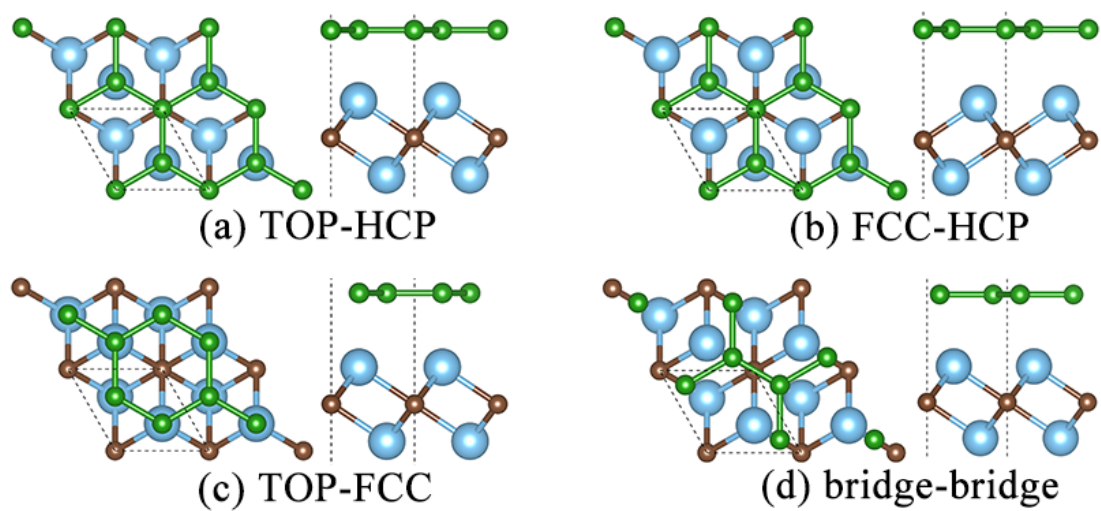

Figure S1. Initial structures of TOP-HCP (a), FCC-HCP (b), TOP-FCC (c) and bridge-bridge (d).

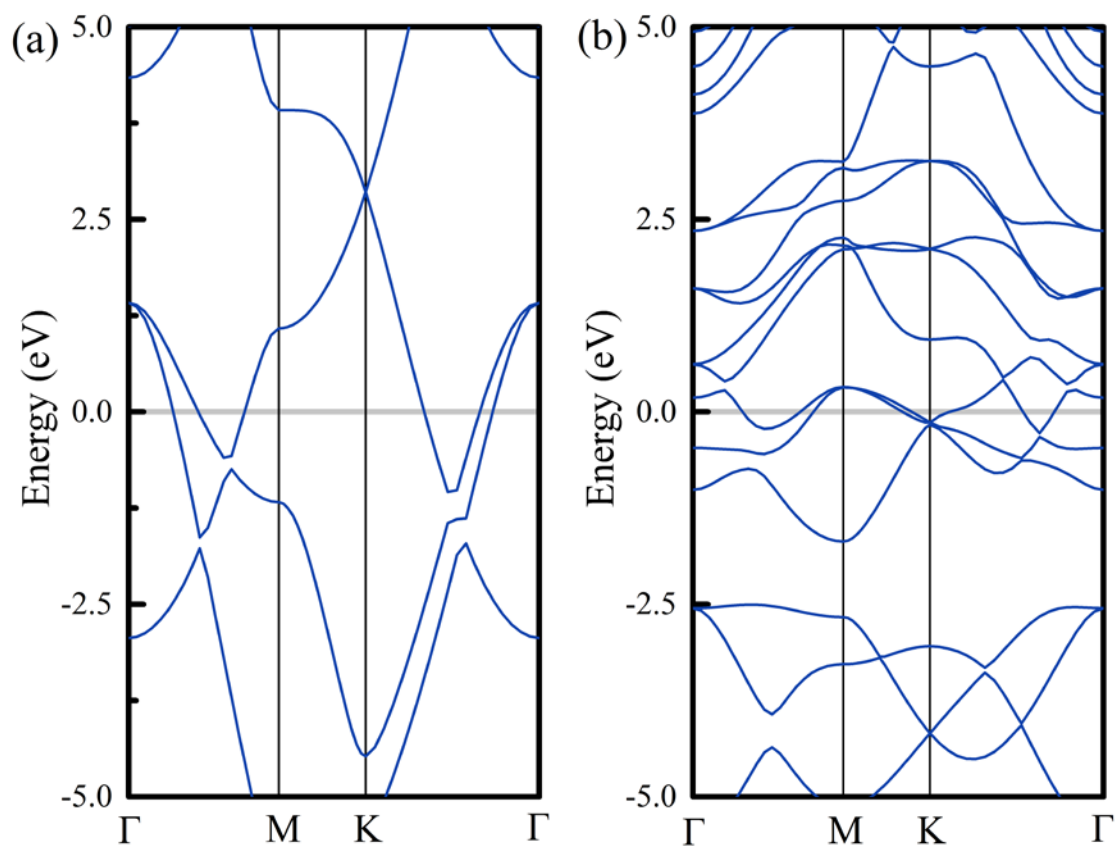

Figure S2. Band structures of free-standing honeycomb borophene (a) and  $\text{Ti}_2\text{C}$  (b), respectively.

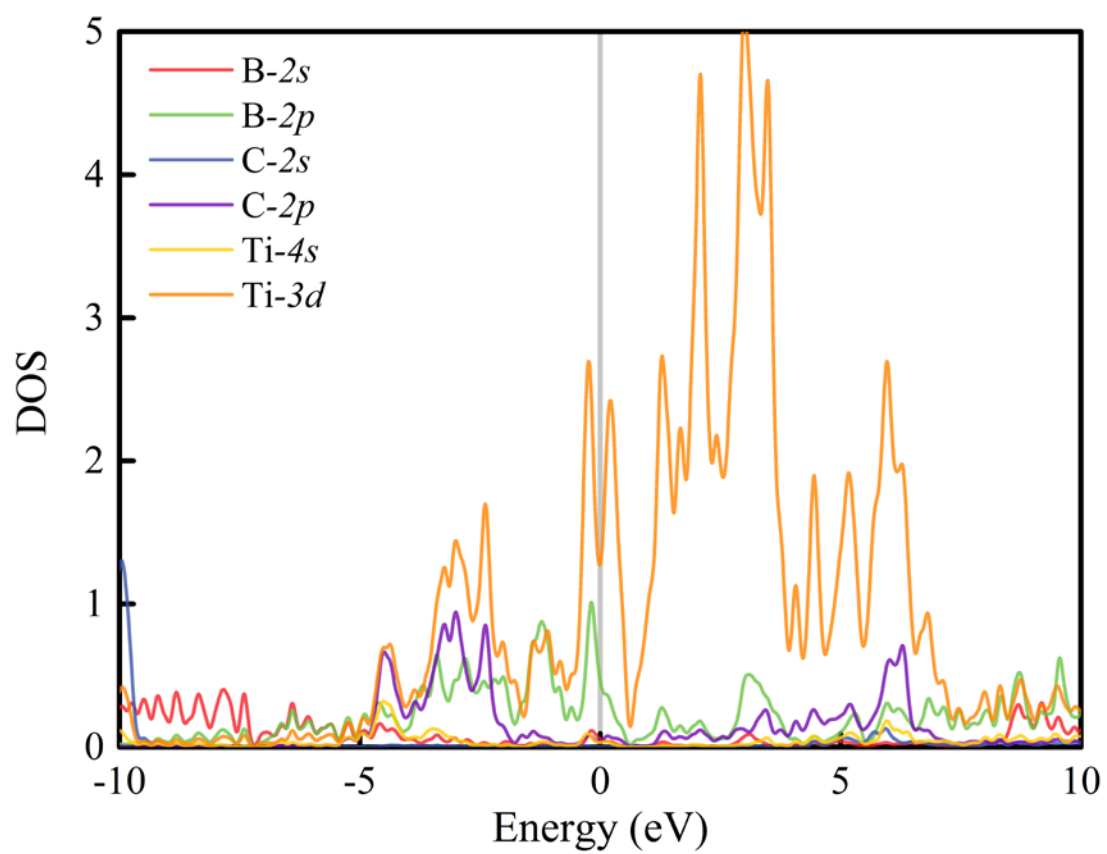

Figure S3. PDOS of borophene/Ti<sub>2</sub>C system.
